# Supplementary material for: Ticagrelor vs. clopidogrel in patients with acute coronary syndromes and diabetes: a substudy from the PLATelet inhibition and patient Outcomes (PLATO) trial
Source: PubMed Central journal article supplement — Eur Heart J. 2010 Aug 29;31(24):3006–16. doi: 10.1093/eurheartj/ehq325 (PMC3001588; doi:10.1093/eurheartj/ehq325), 2010-08-29
Supplement: supp_ehq325_ehq325supp.pdf [file supp_ehq325_ehq325supp.pdf]

**Table 6. Patient characteristics at baseline in the randomized groups by diabetes status.**

| Characteristic                                       | Diabetes            |                      |       | No diabetes         |                      |       |
|------------------------------------------------------|---------------------|----------------------|-------|---------------------|----------------------|-------|
|                                                      | Ticagrelor (N=2326) | Clopidogrel (N=2336) | p     | Ticagrelor (N=6999) | Clopidogrel (N=6952) | p     |
| Age, median (25th - 75th percentile)                 | 64 (56 - 72)        | 64 (56 - 72)         | 0.738 | 61 (53 - 70)        | 61 (53 - 70)         | 0.745 |
| Age ≥ 75 yrs % (n)                                   | 17.1 (398)          | 17.6 (411)           | 0.663 | 14.2 (997)          | 15.4 (1070)          | 0.163 |
| Gender, women, % (n)                                 | 33.9 (789)          | 35.7 (835)           | 0.191 | 26.6 (1865)         | 25.8 (1795)          | 0.267 |
| Body weight median (25th - 75th percentile)          | 82 (71 - 94)        | 80 (70 - 92)         | 0.061 | 79 (70 - 89)        | 79 (70 - 89)         | 0.873 |
| Body weight < 60 kg, % (n)                           | 5.5 (128)           | 6.3 (146)            | 0.114 | 7.5 (524)           | 7.4 (514)            | 0.966 |
| BMI median (25th - 75th percentile)                  | 28.8 (25.7 - 32.4)  | 28.4 (25.7 - 31.9)   | 0.134 | 27.0 (24.5 - 29.9)  | 27.0 (24.4 - 29.8)   | 0.260 |
| Waist circumference, median (25th - 75th percentile) | 102 (93 - 110)      | 102 (92 - 111)       | 0.736 | 96 (89 - 105)       | 97 (89 - 105)        | 0.575 |
| Race, % (n)                                          |                     |                      | 0.747 |                     |                      | 0.930 |
| Black                                                | 2.3 (53)            | 1.9 (45)             |       | 0.9 (62)            | 1.0 (69)             |       |
| Caucasian                                            | 89.6 (2083)         | 89.3 (2086)          |       | 92.5 (6476)         | 92.4 (6422)          |       |
| Oriental                                             | 6.6 (154)           | 7.1 (165)            |       | 5.5 (388)           | 5.6 (389)            |       |
| Other                                                | 1.5 (36)            | 1.7 (40)             |       | 1.0 (73)            | 1.0 (72)             |       |
| CV Risk Factors, % (n)                               |                     |                      |       |                     |                      |       |
| Habitual smoker                                      | 24.6 (573)          | 25.0 (583)           | 0.799 | 39.8 (2787)         | 39.4 (2735)          | 0.577 |

|                                                                                                         |                  |                  |       |                 |                 |       |
|---------------------------------------------------------------------------------------------------------|------------------|------------------|-------|-----------------|-----------------|-------|
| Hypertension                                                                                            | 81.8 (1902)      | 81.3 (1900)      | 0.701 | 60.5 (4237)     | 59.6 (4144)     | 0.263 |
| Dyslipidemia                                                                                            | 58.5 (1361)      | 60.8 (1421)      | 0.107 | 42.7 (2986)     | 42.0 (2921)     | 0.435 |
| History, % (n)                                                                                          |                  |                  |       |                 |                 |       |
| Angina pectoris                                                                                         | 53.2 (1238)      | 54.8 (1279)      | 0.296 | 42.6 (2982)     | 41.1 (2859)     | 0.076 |
| Myocardial infarction                                                                                   | 27.0 (629)       | 27.1 (632)       | 0.992 | 18.2 (1271)     | 18.6 (1292)     | 0.517 |
| Congestive heart failure                                                                                | 9.0 (209)        | 9.9 (231)        | 0.291 | 4.3 (304)       | 4.4 (306)       | 0.867 |
| Percutaneous coronary intervention                                                                      | 18.4 (428)       | 17.9 (419)       | 0.681 | 12.1 (844)      | 11.5 (801)      | 0.327 |
| Coronary artery bypass graft                                                                            | 10.4 (242)       | 9.5 (222)        | 0.304 | 4.1 (290)       | 5.1 (352)       | 0.010 |
| Transient ischemic attack                                                                               | 3.1 (72)         | 3.6 (85)         | 0.304 | 2.5 (174)       | 2.4 (168)       | 0.791 |
| Non-hemorrhagic stroke                                                                                  | 5.4 (126)        | 6.1 (143)        | 0.302 | 3.2 (227)       | 3.3 (226)       | 0.979 |
| Peripheral arterial disease                                                                             | 8.8 (204)        | 9.7 (227)        | 0.264 | 5.2 (362)       | 5.0 (351)       | 0.741 |
| Chronic renal disease                                                                                   | 7.6 (176)        | 8.0 (186)        | 0.614 | 2.9 (203)       | 3.2 (220)       | 0.363 |
| OL <sup>3</sup> Clopidogrel before randomization $\geq$ 600, % (n)                                      | 9.4 (219)        | 8.6 (202)        | 0.360 | 13.4 (937)      | 13.1 (909)      | 0.586 |
| Total clopidogrel (OL+IP) <sup>1</sup> dose $\geq$ 600 mg before randomisation to 24 h after first dose | 16.7 (388)       | 16.1 (377)       | 0.617 | 22.3 (1562)     | 21.8 (1518)     | 0.492 |
| Planned invasive, % (n)                                                                                 | 65.8 (1530)      | 67.6 (1579)      | 0.188 | 74.2 (5195)     | 73.3 (5094)     | 0.202 |
| Baseline labs, median (25th - 75th percentile)                                                          |                  |                  |       |                 |                 |       |
| Glucose, mmol/L                                                                                         | 9.6 (7.1 - 13.0) | 9.9 (7.3 - 13.4) | 0.038 | 6.4 (5.6 - 7.8) | 6.4 (5.6 - 7.7) | 0.050 |

|                                                   |                    |                    |       |                   |                    |       |
|---------------------------------------------------|--------------------|--------------------|-------|-------------------|--------------------|-------|
| HbA1c, %                                          | 7.6 (6.7 - 8.9)    | 7.6 (6.6 - 9.1)    | 0.698 | 5.8 (5.6 - 6.1)   | 5.8 (5.6 - 6.1)    | 0.575 |
| Creatinine clearance, ml/min                      | 76.5 (58.4 - 97.0) | 76.2 (57.6 - 96.4) | 0.568 | 81.7 (65.4 - 100) | 81.5 (64.1 - 99.1) | 0.137 |
| First central troponin I <sup>2</sup> ,<br>umol/L | 2.1 (0.2 - 12.1)   | 2.1 (0.2 - 11.0)   | 0.881 | 2.0 (0.2 - 11.8)  | 2.3 (0.2 - 12.5)   | 0.030 |

---

<sup>1</sup> OL = Open label and IP= Investigational product

<sup>2</sup> Advia Centaur TnI-Ultra Immunoassay (Siemens).

**Table 7: Patient procedures in the randomized groups by diabetes status.**

| Characteristic                                                | Diabetes               |                         |       | No diabetes            |                         |       |
|---------------------------------------------------------------|------------------------|-------------------------|-------|------------------------|-------------------------|-------|
|                                                               | Ticagrelor<br>(N=2326) | Clopidogrel<br>(N=2336) | P     | Ticagrelor<br>(N=6999) | Clopidogrel<br>(N=6952) | P     |
| Medications from index event to end of hospitalization, % (n) |                        |                         |       |                        |                         |       |
| Aspirin                                                       | 97.2 (2262)            | 96.9 (2263)             | 0.501 | 97.2 (6797)            | 97.3 (6752)             | 0.662 |
| Beta-blockers                                                 | 83.8 (1950)            | 83.5 (1949)             | 0.736 | 86.2 (6029)            | 86.6 (6013)             | 0.436 |
| ACE-inhibitors and/or Angiotensin Receptor blockers           | 89.7 (2086)            | 89.9 (2100)             | 0.774 | 81.1 (5674)            | 80.9 (5613)             | 0.722 |
| Cholesterol lowering (Statin)                                 | 93.6 (2176)            | 93.5 (2183)             | 0.933 | 94.0 (6576)            | 94.0 (6523)             | 0.963 |
| Ca-channel blockers                                           | 30.0 (697)             | 29.5 (688)              | 0.708 | 18.4 (1289)            | 19.4 (1349)             | 0.128 |
| Diuretics                                                     | 49.7 (1156)            | 49.0 (1145)             | 0.651 | 34.4 (2403)            | 33.0 (2289)             | 0.087 |
| Glycoprotein IIb/IIIa inhibitors                              | 22.9 (533)             | 25.1 (586)              | 0.083 | 28.3 (1980)            | 27.9 (1938)             | 0.587 |
| Insulin                                                       | 54.8 (1275)            | 55.6 (1298)             | 0.595 | 5.8 (407)              | 5.2 (359)               | 0.094 |
| Any anti-diabetic medication                                  | 84.4 (1964)            | 83.9 (1960)             | 0.642 | 6.6 (464)              | 6.1 (422)               | 0.181 |
| Procedures, % (n)                                             |                        |                         |       |                        |                         |       |
| Coronary angiography before discharge                         | 76.7 (1784)            | 78.0 (1823)             | 0.274 | 83.1 (5814)            | 82.7 (5748)             | 0.543 |
| Coronary angiography during study                             | 82.3 (1914)            | 83.4 (1949)             | 0.299 | 87.1 (6093)            | 86.6 (6023)             | 0.465 |
| PCI before discharge                                          | 52.8 (1227)            | 55.1 (1287)             | 0.109 | 63.7 (4460)            | 63.1 (4389)             | 0.469 |
| PCI during study                                              | 56.6 (1316)            | 59.4 (1387)             | 0.053 | 66.6 (4662)            | 66.3 (4612)             | 0.737 |

|                                      |             |             |       |             |             |       |
|--------------------------------------|-------------|-------------|-------|-------------|-------------|-------|
| Stenting                             | 52.8 (1229) | 55.3 (1291) | 0.096 | 63.0 (4411) | 62.7 (4358) | 0.681 |
| With bare-metal stent only           | 32.5 (756)  | 33.5 (782)  | 0.480 | 45.2 (3165) | 44.7 (3110) | 0.564 |
| With $\geq 1$ drug-eluting stent     | 20.3 (473)  | 21.8 (509)  | 0.223 | 17.8 (1246) | 18.0 (1248) | 0.818 |
| CABG before discharge                | 5.9 (138)   | 6.9 (162)   | 0.163 | 4.7 (327)   | 4.9 (343)   | 0.470 |
| CABG during study                    | 13.1 (304)  | 13.4 (313)  | 0.740 | 9.0 (627)   | 9.4 (655)   | 0.344 |
| Final diagnosis <sup>1</sup> , % (n) |             |             | 0.848 |             |             | 0.494 |
| NSTEMI                               | 48.4 (1125) | 46.7 (1092) |       | 41.1 (2880) | 41.1 (2858) |       |
| Other                                | 2.7 (62)    | 2.9 (68)    |       | 2.8 (197)   | 2.3 (162)   |       |
| STEMI                                | 28.2 (655)  | 29.2 (681)  |       | 40.6 (2841) | 41.0 (2849) |       |
| Unstable angina pectoris             | 20.7 (482)  | 21.1 (493)  |       | 15.2 (1067) | 15.4 (1070) |       |

<sup>1</sup> Type of ACS defined using final diagnosis of index event.

**Table 8.** Glucose / HbA1c by treatment interactions in patients without diabetes

|                                                                   | N    | Overall    | Ticagrelor | Clopidogrel | HR (95% CI)        | P<br>(interaction) |
|-------------------------------------------------------------------|------|------------|------------|-------------|--------------------|--------------------|
| <b>Cardiovascular death,<br/>myocardial infarction, or stroke</b> |      |            |            |             |                    |                    |
| Glucose < 6.4 mmol/L <sup>1</sup>                                 | 5503 | 8.4 (430)  | 7.4 (186)  | 9.5 (244)   | 0.78 (0.64 - 0.94) | 0.71               |
| Glucose ≥ 6.4 mmol/L <sup>1</sup>                                 | 5904 | 10.2 (572) | 9.4 (270)  | 11.0 (302)  | 0.86 (0.73 - 1.02) |                    |
| HbA1c < 5.8% <sup>1</sup>                                         | 4798 | 8.4 (383)  | 8.3 (193)  | 8.6 (190)   | 1.01 (0.83 - 1.24) | 0.04               |
| HbA1c ≥ 5.8% <sup>1</sup>                                         | 6545 | 9.9 (611)  | 8.5 (259)  | 11.4 (352)  | 0.73 (0.62 - 0.85) |                    |
| <b>All cause death</b>                                            |      |            |            |             |                    |                    |
| Glucose < 6.4 mmol/L <sup>1</sup>                                 | 5503 | 3.3 (162)  | 2.6 (65)   | 3.9 (97)    | 0.69 (0.50 - 0.94) | 0.48               |
| Glucose ≥ 6.4 mmol/L <sup>1</sup>                                 | 5904 | 5.3 (293)  | 4.7 (135)  | 5.9 (158)   | 0.83 (0.66 - 1.04) |                    |
| HbA1c < 5.8% <sup>1</sup>                                         | 4798 | 3.7 (166)  | 3.1 (70)   | 4.4 (96)    | 0.72 (0.53 - 0.98) | 0.63               |
| HbA1c ≥ 5.8% <sup>1</sup>                                         | 6545 | 4.6 (283)  | 4.1 (126)  | 5.2 (157)   | 0.80 (0.63 - 1.01) |                    |
| <b>Myocardial infarction</b>                                      |      |            |            |             |                    |                    |
| Glucose < 6.4 mmol/L <sup>1</sup>                                 | 5503 | 5.8 (297)  | 5.1 (129)  | 6.5 (168)   | 0.78 (0.62 - 0.99) | 0.80               |
| Glucose ≥ 6.4 mmol/L <sup>1</sup>                                 | 5904 | 5.7 (312)  | 5.1 (144)  | 6.2 (168)   | 0.83 (0.66 - 1.03) |                    |

|                                                       |      |            |            |            |                    |      |
|-------------------------------------------------------|------|------------|------------|------------|--------------------|------|
| HbA1c < 5.8% <sup>1</sup>                             | 4798 | 5.4 (243)  | 5.3 (124)  | 5.5 (119)  | 1.03 (0.80 - 1.33) | 0.03 |
| HbA1c ≥ 5.8% <sup>1</sup>                             | 6545 | 6.0 (364)  | 5.0 (149)  | 7.0 (215)  | 0.68 (0.56 - 0.84) |      |
| <b>Definite stent thrombosis</b>                      |      |            |            |            |                    |      |
| Glucose < 6.4 mmol/L <sup>1</sup>                     | 3136 | 1.0 (30)   | 1.2 (17)   | 0.8 (13)   | 1.29 (0.63 - 2.65) | 0.23 |
| Glucose ≥ 6.4 mmol/L <sup>1</sup>                     | 4049 | 1.7 (69)   | 1.3 (26)   | 2.2 (43)   | 0.60 (0.37 - 0.98) |      |
| HbA1c < 5.8% <sup>1</sup>                             | 3052 | 1.4 (41)   | 1.3 (18)   | 1.5 (23)   | 0.76 (0.41 - 1.41) | 0.08 |
| HbA1c ≥ 5.8% <sup>1</sup>                             | 4108 | 1.5 (58)   | 1.3 (25)   | 1.6 (33)   | 0.75 (0.45 - 1.27) |      |
| <b>Major bleeding, PLATO defined</b>                  |      |            |            |            |                    |      |
| Glucose < 6.4 mmol/L <sup>1</sup>                     | 5503 | 10.5 (516) | 10.7 (257) | 10.2 (259) | 1.02 (0.86 - 1.21) | 0.04 |
| Glucose ≥ 6.4 mmol/L <sup>1</sup>                     | 5904 | 9.8 (526)  | 10.8 (295) | 8.8 (231)  | 1.25 (1.05 - 1.49) |      |
| HbA1c < 5.8% <sup>1</sup>                             | 4798 | 9.1 (400)  | 10.3 (224) | 8.0 (176)  | 1.28 (1.05 - 1.56) | 0.74 |
| HbA1c ≥ 5.8% <sup>1</sup>                             | 6545 | 10.9 (643) | 11.3 (332) | 10.6 (311) | 1.07 (0.92 - 1.25) |      |
| <b>Non-CABG related major bleeding, PLATO defined</b> |      |            |            |            |                    |      |
| Glucose < 6.4 mmol/L <sup>1</sup>                     | 5503 | 3.5 (164)  | 3.8 (88)   | 3.1 (76)   | 1.19 (0.88 - 1.62) | 0.24 |
| Glucose ≥ 6.4 mmol/L <sup>1</sup>                     | 5904 | 3.9 (205)  | 4.4 (118)  | 3.3 (87)   | 1.32 (1.00 - 1.75) |      |

|                                                   |      |           |           |           |                    |      |
|---------------------------------------------------|------|-----------|-----------|-----------|--------------------|------|
| HbA1c < 5.8% <sup>1</sup>                         | 4798 | 3.4 (147) | 4.3 (91)  | 2.5 (56)  | 1.63 (1.17 - 2.28) | 0.64 |
| HbA1c ≥ 5.8% <sup>1</sup>                         | 6545 | 3.8 (218) | 4.1 (116) | 3.6 (102) | 1.14 (0.88 - 1.49) |      |
| <b>CABG related major bleeding, PLATO defined</b> |      |           |           |           |                    |      |
| Glucose < 6.4 mmol/L <sup>1</sup>                 | 5503 | 7.3 (367) | 7.1 (174) | 7.6 (193) | 0.93 (0.76 - 1.14) | 0.23 |
| Glucose ≥ 6.4 mmol/L <sup>1</sup>                 | 5904 | 6.3 (334) | 6.7 (181) | 5.9 (153) | 1.15 (0.93 - 1.43) |      |
| HbA1c < 5.8% <sup>1</sup>                         | 4798 | 6.0 (263) | 6.1 (133) | 6.0 (130) | 1.02 (0.80 - 1.30) | 0.73 |
| HbA1c ≥ 5.8% <sup>1</sup>                         | 6545 | 7.5 (443) | 7.6 (225) | 7.4 (218) | 1.04 (0.86 - 1.25) |      |
| <b>Major bleeding, TIMI defined</b>               |      |           |           |           |                    |      |
| Glucose < 6.4 mmol/L <sup>1</sup>                 | 5503 | 7.3 (359) | 7.4 (181) | 7.1 (178) | 1.05 (0.85 - 1.29) | 0.30 |
| Glucose ≥ 6.4 mmol/L <sup>1</sup>                 | 5904 | 6.9 (370) | 7.6 (207) | 6.1 (163) | 1.24 (1.01 - 1.52) |      |
| HbA1c < 5.8% <sup>1</sup>                         | 4798 | 6.5 (282) | 7.0 (152) | 5.9 (130) | 1.17 (0.92 - 1.48) | 0.51 |
| HbA1c ≥ 5.8% <sup>1</sup>                         | 6545 | 7.7 (454) | 8.2 (242) | 7.2 (212) | 1.15 (0.96 - 1.38) |      |

---

<sup>1</sup>The median of glucose and HbA1c is calculated from the cohort without diabetes
